# Supplementary material for: Genetic Evidence for a Link Between Glycolysis and DNA Replication
Source: PLoS One. 2007 May 16;2(5):e447. doi: 10.1371/journal.pone.0000447 (PMC1866360; doi:10.1371/journal.pone.0000447)
Supplement: Table S1 — (0.05 MB XLS) [file pone.0000447.s001.xls]

## Sheet: Feuil1
Supplementary Table 1 : B. subtilis strains used
Previously published strains
	Name	Context	Genotype	Main phenotypes or properties	Reference	Source
Reference strains	168	168	trpC2	WT		Laboratory collection
	L1430	168	ilvA1 metC lys-21	WT	Mauel and Karamata, 1984
	TF8A	168	trpC2cured of PBSX, SPb and SKIN	WT	Westers et al., 2003	Laboratory collection
Replication mutants	EDJ44	168	dnaE2.2-pmr trpC2	DnaETs PmR	Dervyn et al., 2001	Laboratory collection
	EDJ46	168	dnaE2.4-pmr trpC2	DnaETs PmR	Dervyn et al., 2001	Laboratory collection
	EDJ48	168	dnaE2.6-pmr trpC2	DnaETs PmR	Dervyn et al., 2001	Laboratory collection
	EDJ51	168	dnaE2.10-pmr trpC2	DnaETs PmR	Dervyn et al., 2001	Laboratory collection
	PB1669	168	dnaP (dnaF69) trpC2	PolCTs	Attolini et al., 1976	Alessendro Galizzi
	L1436	168	dnaF33 metC ilvA1	PolCTs	Mauel and Karamata, 1984	Dimitri Karamata
	BD54 ts-6	168	ts6 spc metB5 ile1	PolCTs SpR	Ott et al., 1986	Neal C. Brown
	L1433	168	dnaC14 metC lys2	DnaCTs	Mauel and Karamata, 1984	Dimitri Karamata
	1A20	168	dnaC30 ilvA1 metB5	DnaCTs	Karamata and Gross, 1970	BGSC
	Ts8133	168	dnaC8133 thy leu8	DnaCTs	Hara and Yoshikawa, 1973	Nigel Harford
	L1435	168	dnaE20 metC ilvA1	DnaGTs	Mauel and Karamata, 1984	Dimitri Karamata
	1474	168	dnaX8132 hisA1 thr5	DnaXTs		BGSC
	L1438	168	dnaH51 metC ilvA1	DnaXTs	Mauel and Karamata, 1984
	L1437	168	dnaG5 metC lys21	DnaNTs	Mauel and Karamata, 1984	Dimitri Karamata
	L1432	168	dnaB19 metC livA1	DnaBTs	Mauel and Karamata, 1984	Dimitri Karamata
	OMM242	168	dnaB37 thyA thyB trpC2	DnaBTs	Levine et al., 1987	Simone J. Seror
	L1434	168	dnaD23 metC lys21	DnaDTs	Mauel and Karamata, 1984	Dimitri Karamata
	L1439	168	dnaI2 metC ilvA1	DnaITs	Mauel and Karamata, 1984	Dimitri Karamata
	FLB5	168	dnaE::[pMUTIN II MCS dnaE-SPA] trpC2	DnaE-SPA EmR		François Lecointe
Division mutants	SU49	160	ts1 trp3	FtsZTs	Callister and Wake, 1981	Elizabeth J. Harry
	SU104	168	div104 trpC2 thyA thyB	DivIBTs		Elizabeth J. Harry
Metabolic mutants	QB5435	168	ptsG::cat tprC2	PtsG- CmR	Stülke et al., 1997	Jörg Stülke
	168 Pgi::spc	168	pgi::spc trpC2	Pgi- SpR		Stéphane Aymerich
	QB2066		pfk1 met	Pfk-	Gay et al., 1983	Stéphane Aymerich
	GM1501	168CA	gapA'::[pMUTIN II] trpC2	GapA- EmR	Fillinger et al., 2000	Stéphane Aymerich
	GTD040	168CA	gapA'::[pMUTIN II D(lacZ-ery)::kan] trpC2	GapA- KmR	Doan and Aymerich, 2003	Stéphane Aymerich
	GM1500	168CA	DgapB::[pMUTIN II] trpC2	GapB- EmR	Fillinger et al., 2000	Stéphane Aymerich
	168 PckA::spc	168	pckA::spc trpC2	PckA- SpR		Stéphane Aymerich
	1012 PykA::kan	168	pykA::kan leuA8 metB5	PykA- KnR		Uwe Sauer
	501-76	168	DpdhB::neo trpC2 pheA1	PdhB- KmR	Gao et al., 2002	Arthur L. Aronson
	501-77	168	DpdhC::neo trpC2 pheA1	PdhC- KmR	Gao et al., 2002	Arthur L. Aronson
	501-78	168	DpdhD::neo trpC2 pheA1	PdhD- KmR	Gao et al., 2002	Arthur L. Aronson
	SJB219	168	DcitC::spc trpC2	CitC- SpR	Jin et al., 1996	Abraham L. Sonenshein
	SJB238	168	DcitH::spc trpC2	CitH- SpR	Jin et al., 1996	Abraham L. Sonenshein
	BSIP1174	168	pta::aphA3 alsS::alsS-lacZ cat trpC2	Pta- KmR	Cruz Ramos et al., 2000	Jahn Dieter
Transcriptional fusions	HVS614	168	dnaE::[pMUTIN II MCS PdnaE::lacZ] trpC2	Promoter dnaE::lacZ EmR dnaE expressed from Pspac-I	Dervyn et al., 2001	Laboratory collection
	HVS609	168	polC::[pMUTIN II MCS PpolC::lacZ] trpC2	Promoter polC::lacZ EmR polC expressed from Pspac-I	Dervyn et al., 2001	Laboratory collection
	HVS597	168	dnaC::[pMUTIN II MCS PdnaC::lacZ] trpC2	Promoter dnaC::lacZ EmR dnaC expressed from Pspac-I	Petit et al., 1998	Laboratory collection
	PS1722	168CA	DccpN amyE'::pSF114(PgapB'::lacZ-cat) trpC2	CcpN- Promoter gapB::lacZ CmR	Servant et al., 2005	Stéphane Aymerich
	GM1514	168CA	amyE'::pSF114(PgapB'::lacZ-cat) trpC2	Promoter gapB::lacZ CmR	Fillinger et al., 2000	Stéphane Aymerich
	References
	1. Westers H, Dorenbos R, van Dijl JM, Kabel J, Flanagan T, et al. (2003) Genome engineering reveals large dispensable regions in Bacillus subtilis. Mol Biol Evol 20: 2076-2090.
	2. Mauel C, Karamata D (1984) Prophage induction in thermosensitive DNA mutants of Bacillus subtilis. Mol Gen Genet 194: 451-456.
	3. Levine A, Henckes G, Vannier F, Seror SJ (1987) Chromosomal initiation in Bacillus subtilis may involve two closely linked origins. Mol Gen Genet 208: 37-44.
	4. Attolini C, Mazza G, Fortunato A, Ciarrocchi G, Mastromei G, et al. (1976) On the identity of dnaP and dnaF genes of Bacillus subtilis. Mol Gen Genet 148: 9-17.
	5. Callister H, Wake RG (1981) Characterization and mapping of temperature-sensitive division initiation mutations of Bacillus subtilis. J Bacteriol 145: 1042-1051.
	6. Cruz Ramos H, Hoffmann T, Marino M, Nedjari H, Presecan-Siedel E, et al. (2000) Fermentative metabolism of Bacillus subtilis: physiology and regulation of gene expression. J Bacteriol 182: 3072-3080.
	7. Dervyn E, Suski C, Daniel R, Bruand C, Chapuis J, et al. (2001) Two essential DNA polymerases at the bacterial replication fork. Science 294: 1716-1719.
	8. Doan T, Aymerich S (2003) Regulation of the central glycolytic genes in Bacillus subtilis: binding of the repressor CggR to its single DNA target sequence is modulated by fructose-1,6-bisphosphate. Mol Microbiol 47: 1709-1721.
	9. Fillinger S, Boschi-Muller S, Azza S, Dervyn E, Branlant G, et al. (2000) Two glyceraldehyde-3-phosphate dehydrogenases with opposite physiological roles in a nonphotosynthetic bacterium. J Biol Chem 275: 14031-14037.
	10. Gao H, Jiang X, Pogliano K, Aronson AI (2002) The E1beta and E2 subunits of the Bacillus subtilis pyruvate dehydrogenase complex are involved in regulation of sporulation. J Bacteriol 184: 2780-2788.
	11. Gay P, Chalumeau H, Steinmetz M (1983) Chromosomal localization of gut, fruC, and pfk mutations affecting genes involved in Bacillus subtilis D-glucitol catabolism. J Bacteriol 153: 1133-1137.
	12. Hara H, Yoshikawa H (1973) Asymmetric bidirectional replication of Bacillus subtilis chromosome. Nat New Biol 244: 200-203.
	13. Jin S, De Jesus-Berrios M, Sonenshein AL (1996) A Bacillus subtilis malate dehydrogenase gene. J Bacteriol 178: 560-563.
	14. Karamata D, Gross JD (1970) Isolation and genetic analysis of temperature-sensitive mutants of B. subtilis defective in DNA synthesis. Mol Gen Genet 108: 277-287.
	15. Ott RW, Barnes MH, Brown NC, Ganesan AT (1986) Cloning and characterization of the polC region of Bacillus subtilis. J Bacteriol 165: 951-957.
	16. Petit MA, Dervyn E, Rose M, Entian KD, McGovern S, et al. (1998) PcrA is an essential DNA helicase of Bacillus subtilis fulfilling functions both in repair and rolling-circle replication. Mol Microbiol 29: 261-273.
	17. Servant P, Le Coq D, Aymerich S (2005) CcpN (YqzB), a novel regulator for CcpA-independent catabolite repression of Bacillus subtilis gluconeogenic genes. Mol Microbiol 55: 1435-1451.
	18. Stulke J, Martin-Verstraete I, Zagorec M, Rose M, Klier A, et al. (1997) Induction of the Bacillus subtilis ptsGHI operon by glucose is controlled by a novel antiterminator, GlcT. Mol Microbiol 25: 65-78.
